# Supplementary material for: Preparation, Properties and Cell Biocompatibility of Room Temperature LCST-Hydrogels Based on Thermoresponsive PEO Stars
Source: MDPI journal article supplement (doi:10.3390/gels7030084), 2021-07-06
Supplement: s1 [file s1]

## Supplementary Files.

Figure 1 NMR and IR of Polymer P1

Figure 2 NMR and IR of Polymer P2

Figure 3 NMR and IR of Polymer P3

Figure 4 NMR and IR of Polymer P4

Figure 5 NMR and IR of Polymer P5

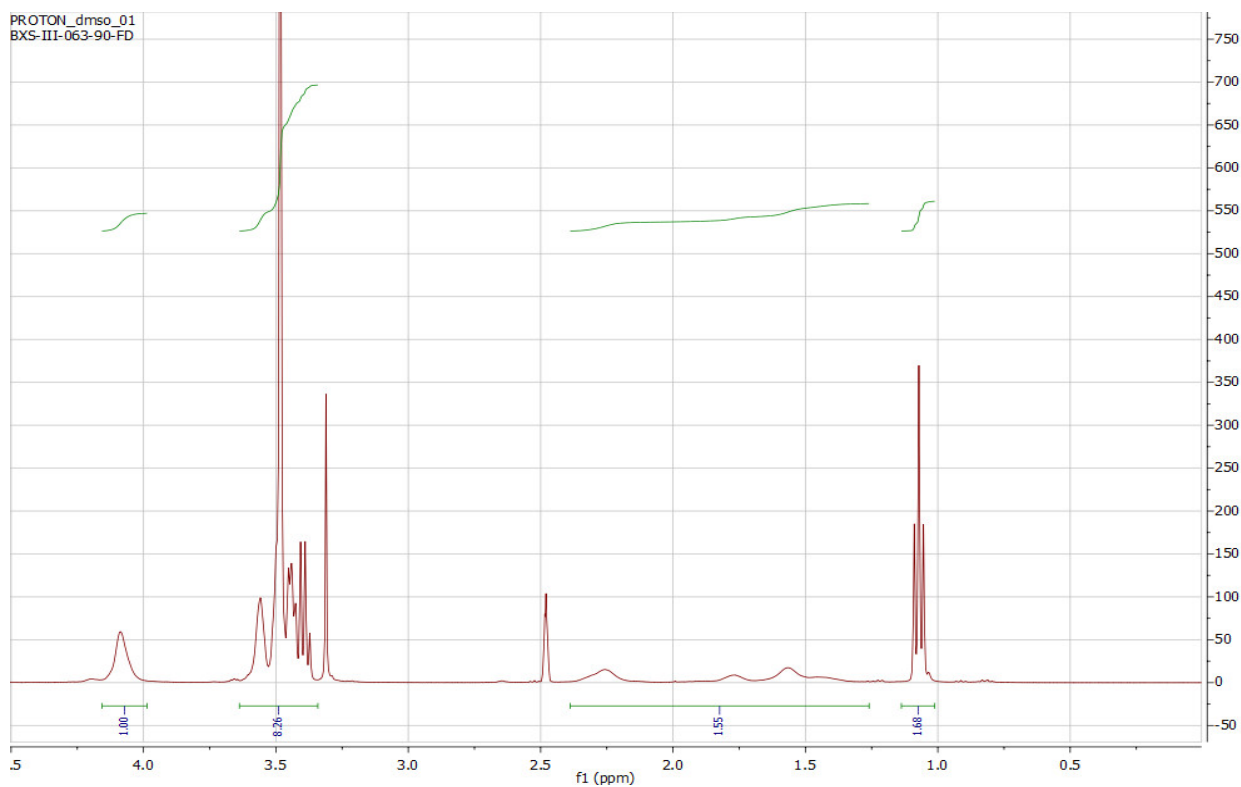

Figure S1a NMR spectra of polymer P1 in DMSO-D6

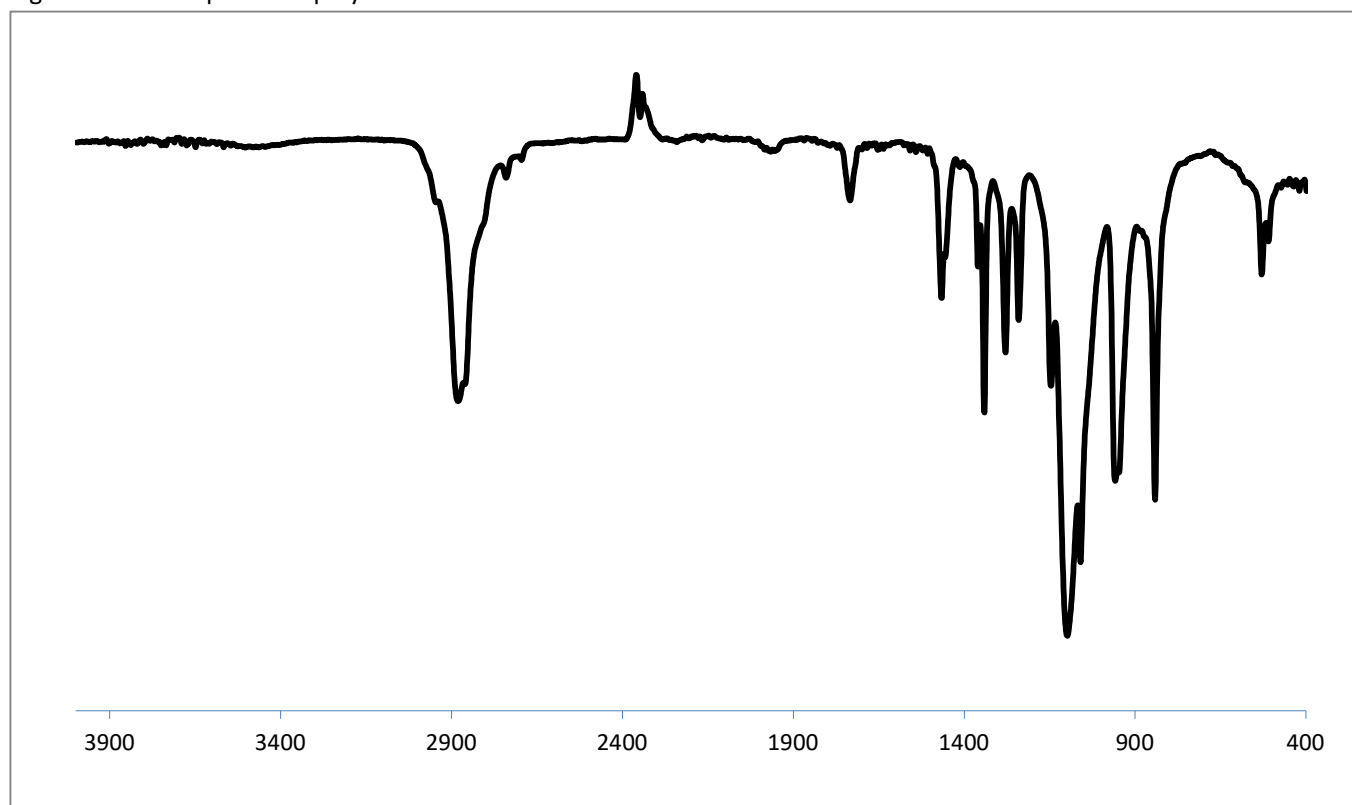

Figure S1b IR spectra of Polymer S1 (neat)

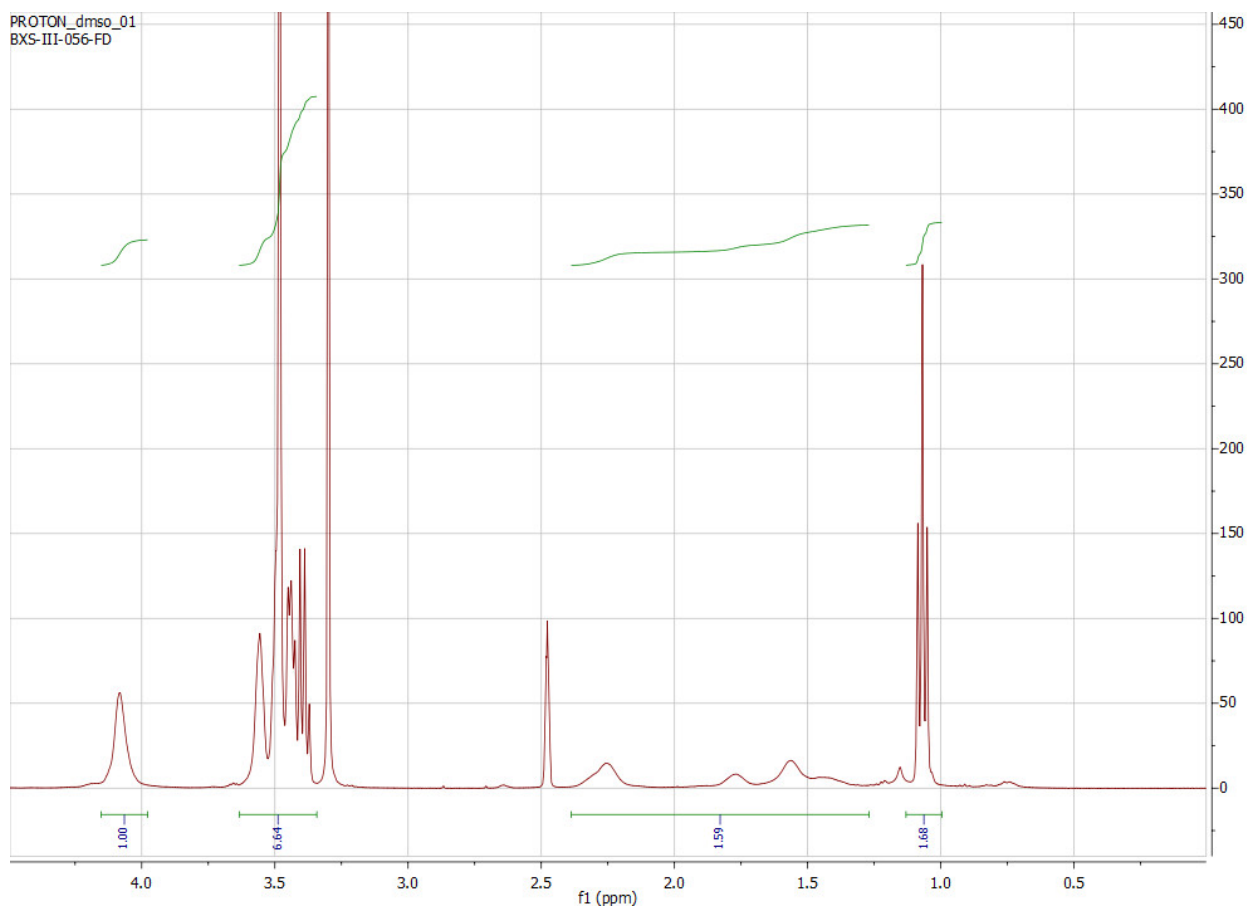

Figure S2a NMR spectrum of P2 (DMSO-D6)

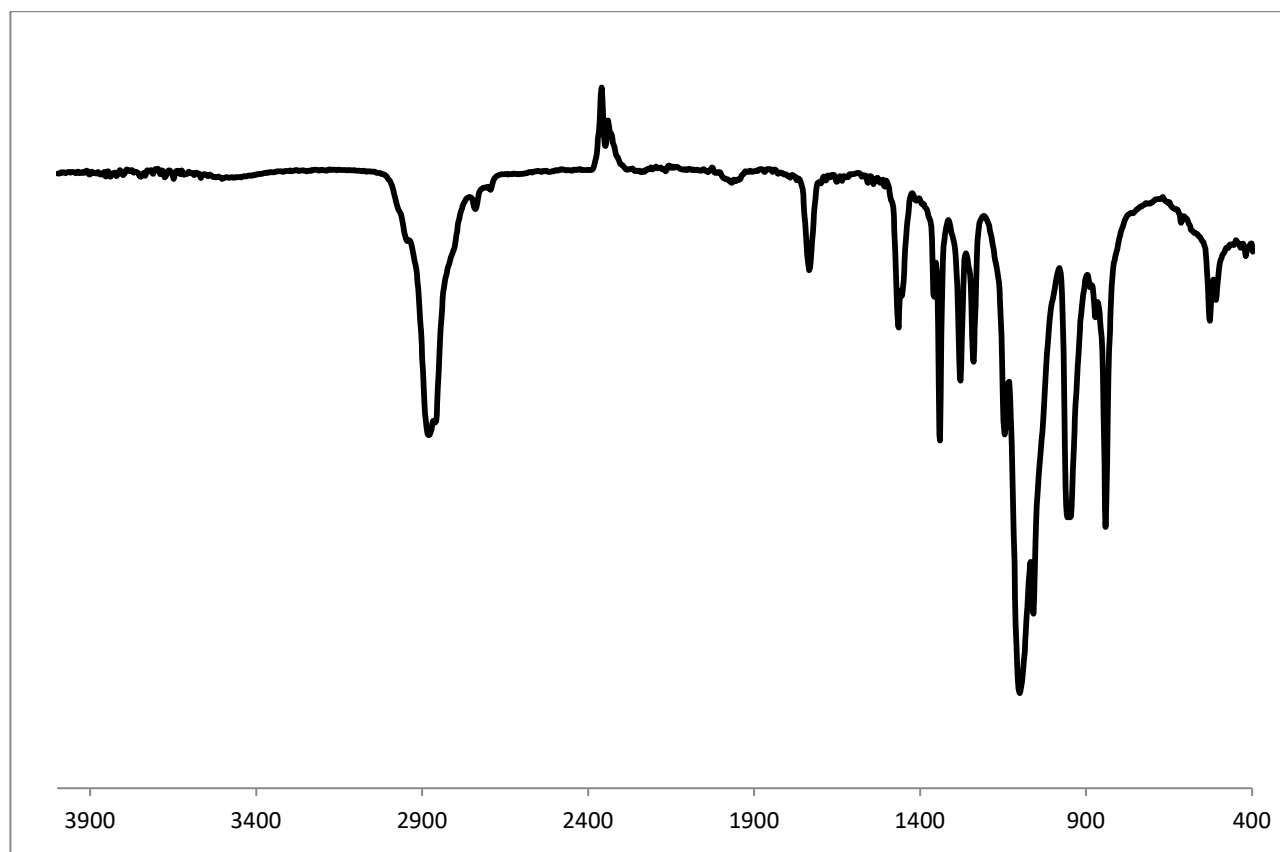

Figure S2b IR spectrum of P2 (neat)

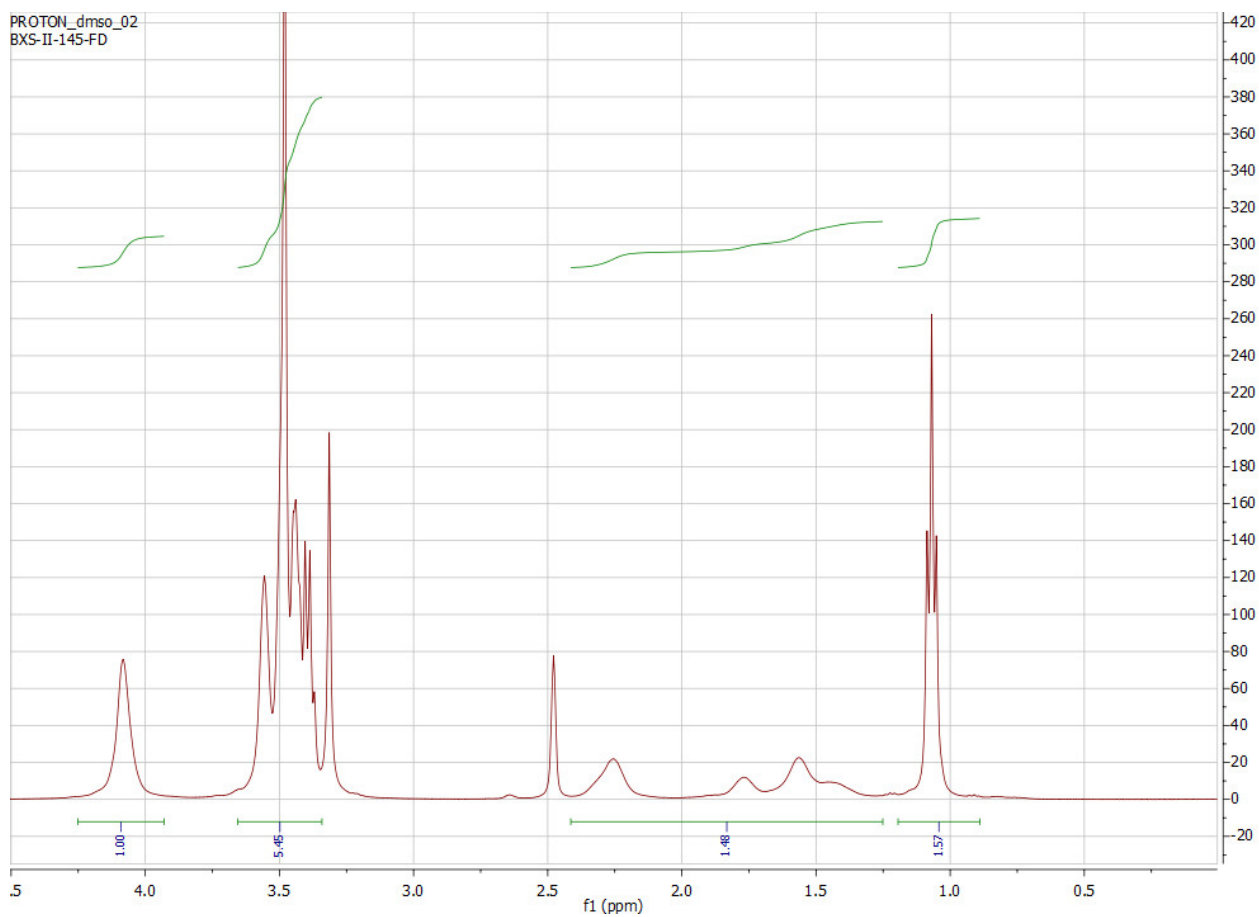

Figure S3a NMR spectrum of P3 (DMSO- $\text{D}_6$ )

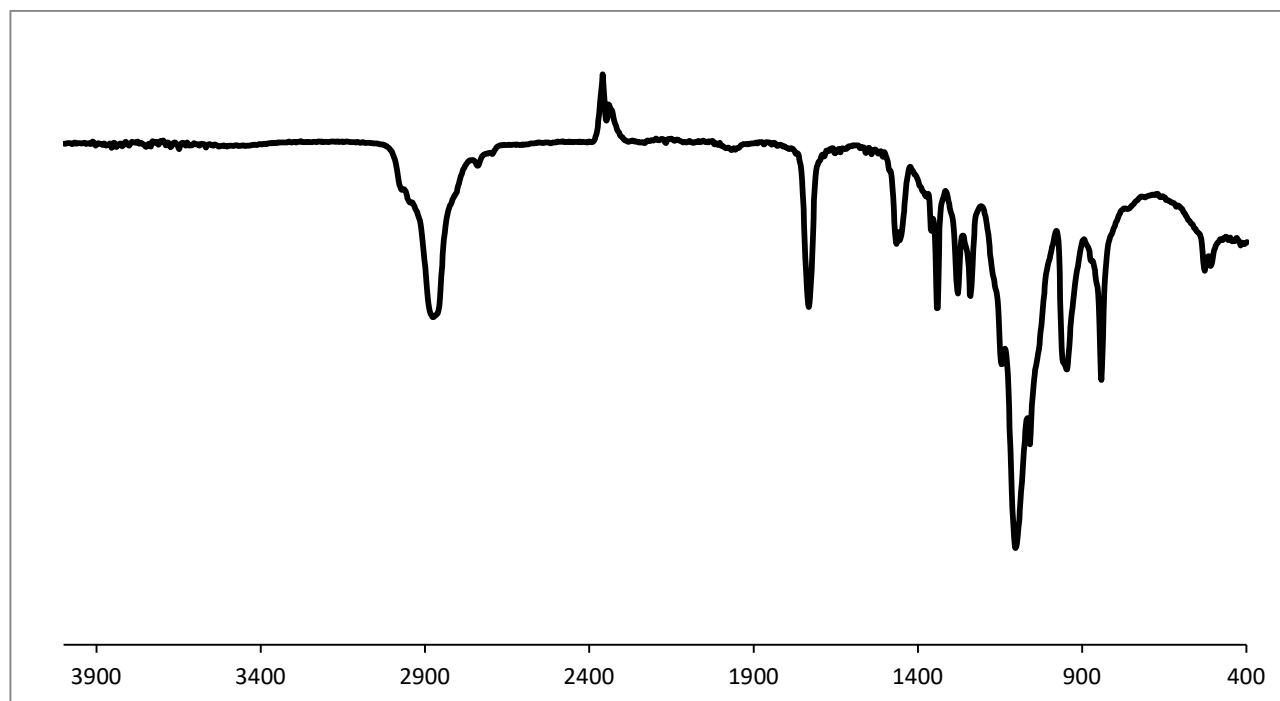

Fig 3b IR spectrum of P3 (neat)

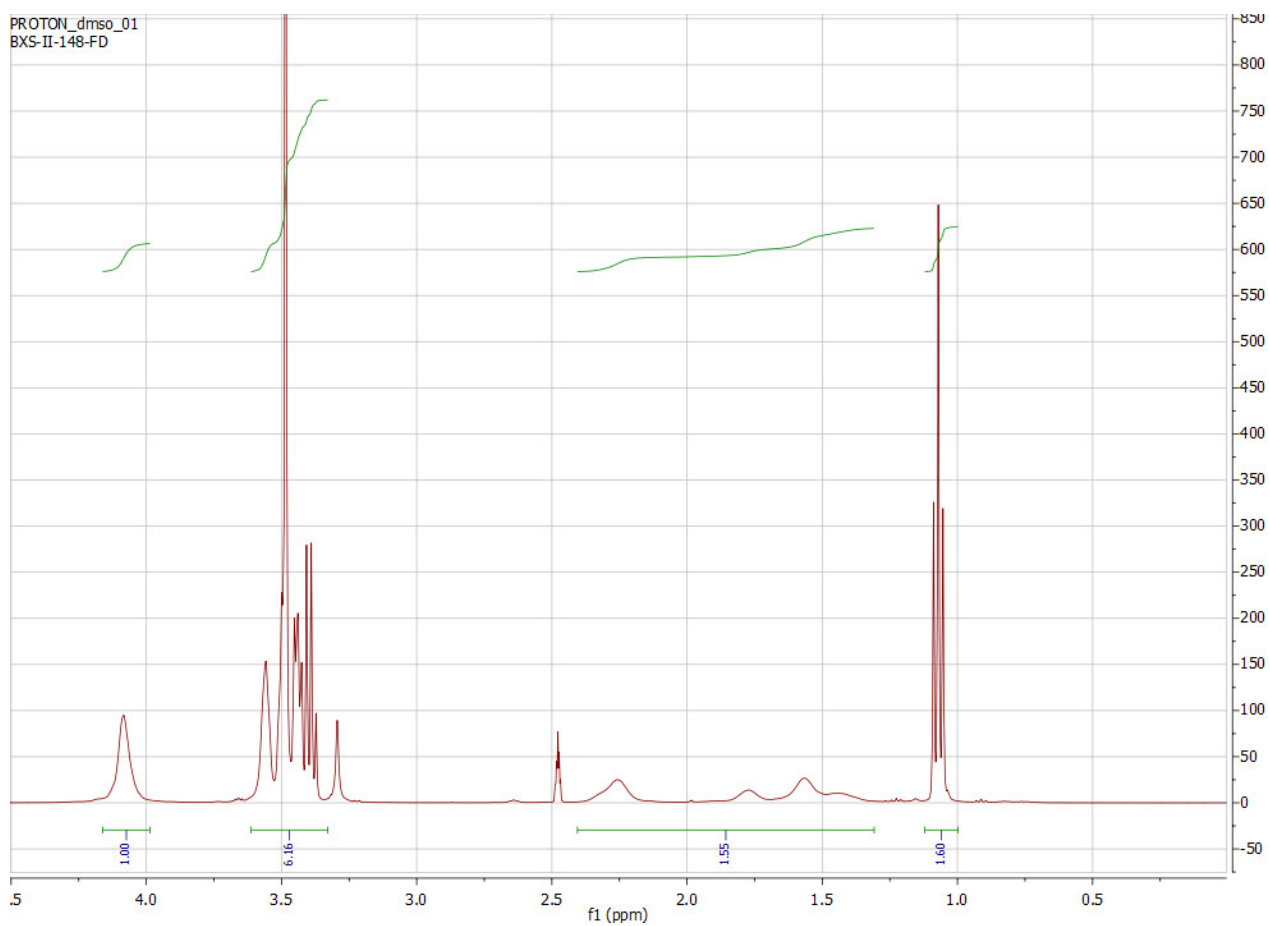

Figure 4a NMR spectrum of P4 (DMSO- $\text{D}_6$ )

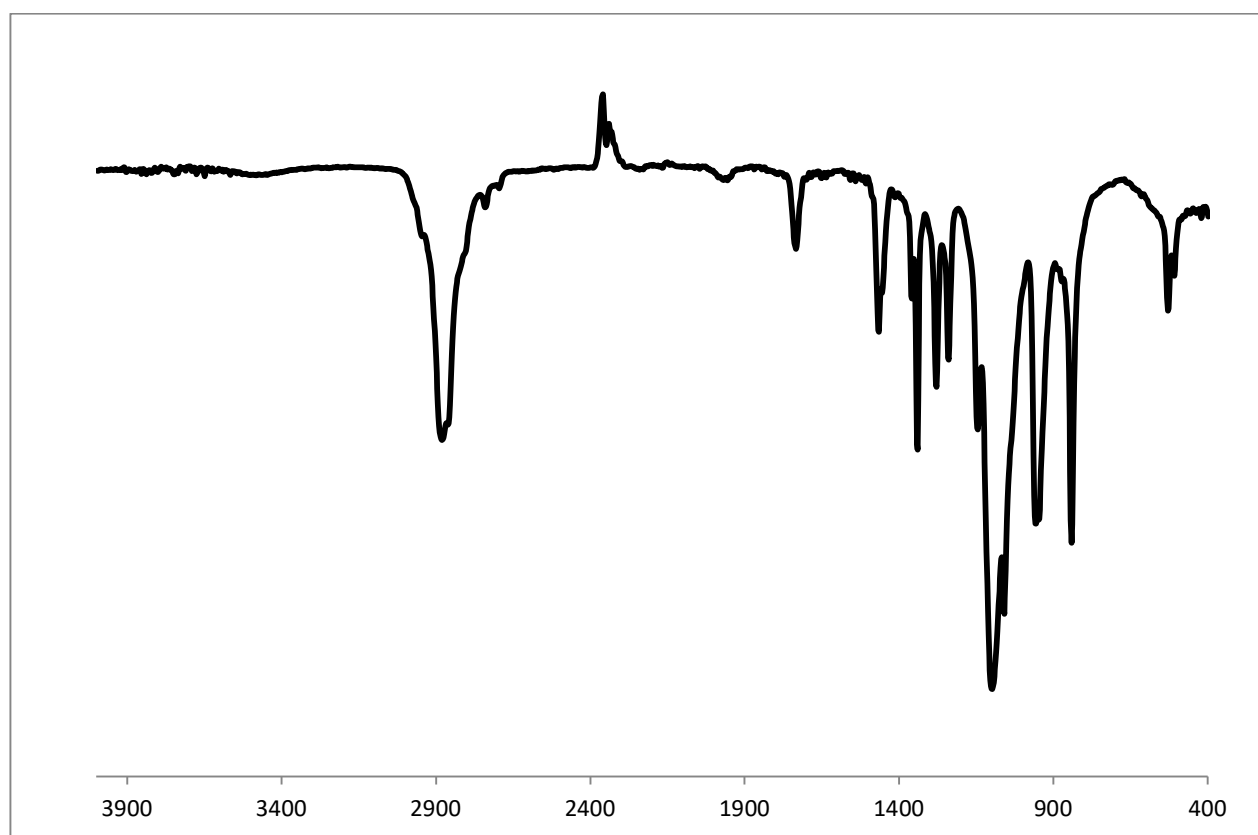

Figure 4b IR spectrum of P4 (neat)

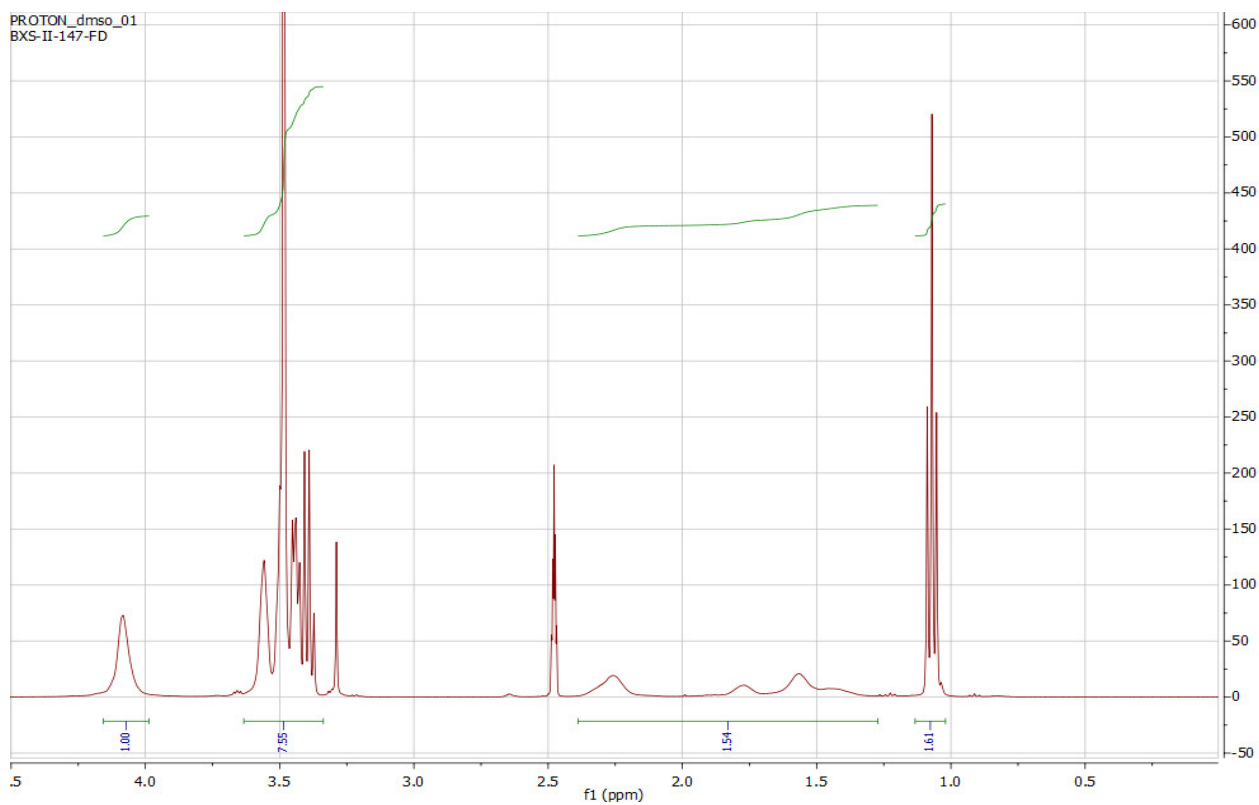

Figure 5a NMR spectrum of P5 ( $\text{DMSO}-D_6$ )

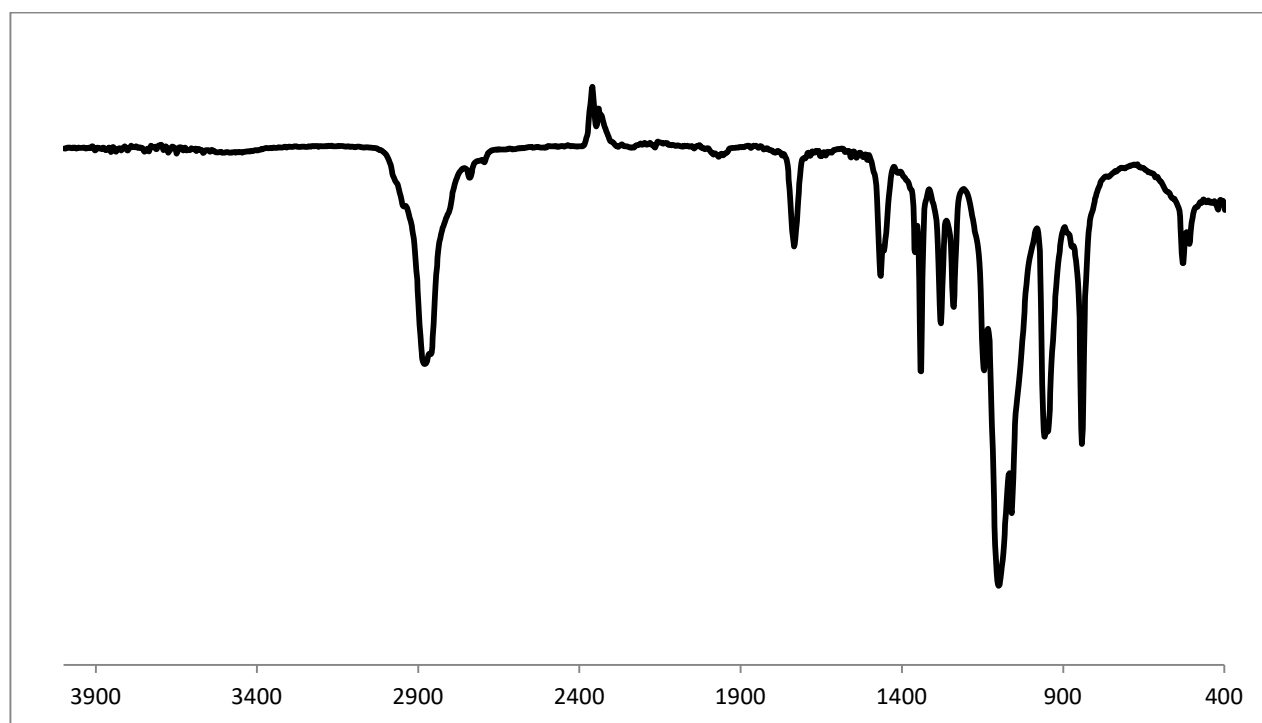

Figure 5b IR spectrum of P5 (neat)
